# Supplementary material for: Electron count and electronic structure of bare icosahedral Au32and Au33ionic nanoclusters and ligated derivatives. Stable models with intermediate superatomic shell fillings
Source: Royal Society of Chemistry journal article supplement (doi:10.1039/d0cp03735d), 2020-01-01
Supplement: d0cp03735d2.pdf [file d0cp03735d2.pdf]

## Supporting Information

**Electron count and electronic structure of bare icosahedral Au<sub>32</sub> and Au<sub>33</sub> ionic nanoclusters and ligated derivatives. Stable models with intermediate superatomic shell fillings.**

*Qi Wang, Jean-François Halet, Samia Kahlal, Alvaro Muñoz-Castro and Jean-Yves Saillard\**

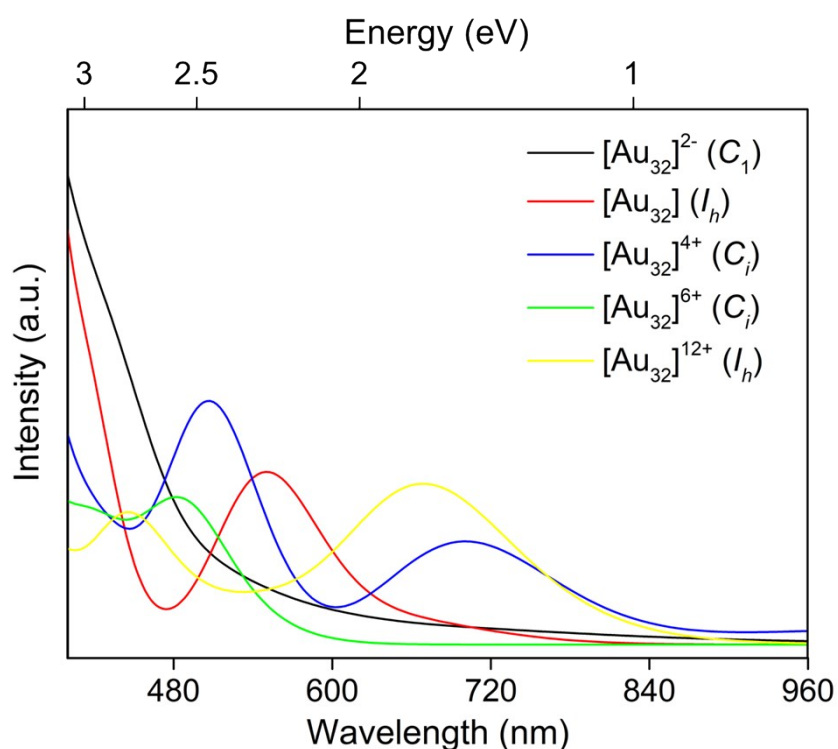

Figure S1. Simulated UV-Vis spectra of the various computed [Au<sub>32</sub>]<sup>q</sup> (q = 12+, 6+, 4+, 0, 2-) structures (B3LYP functional).

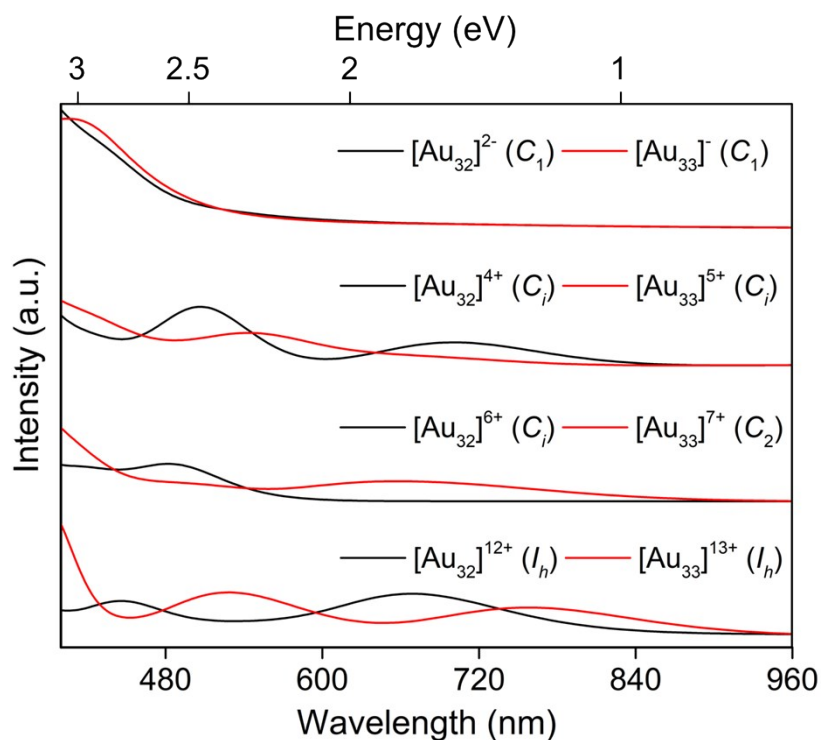

Figure S2. Simulated UV-Vis spectra of the various computed  $[\text{Au}_{33}]^q$  ( $q = 13+, 7+, 5+, -$ ) structures, plotted with their isoelectronic non-centered  $[\text{Au}_{32}]^q$  ( $q = 12+, 6+, 4+, 2-$ ) counterparts for comparison (B3LYP functional).

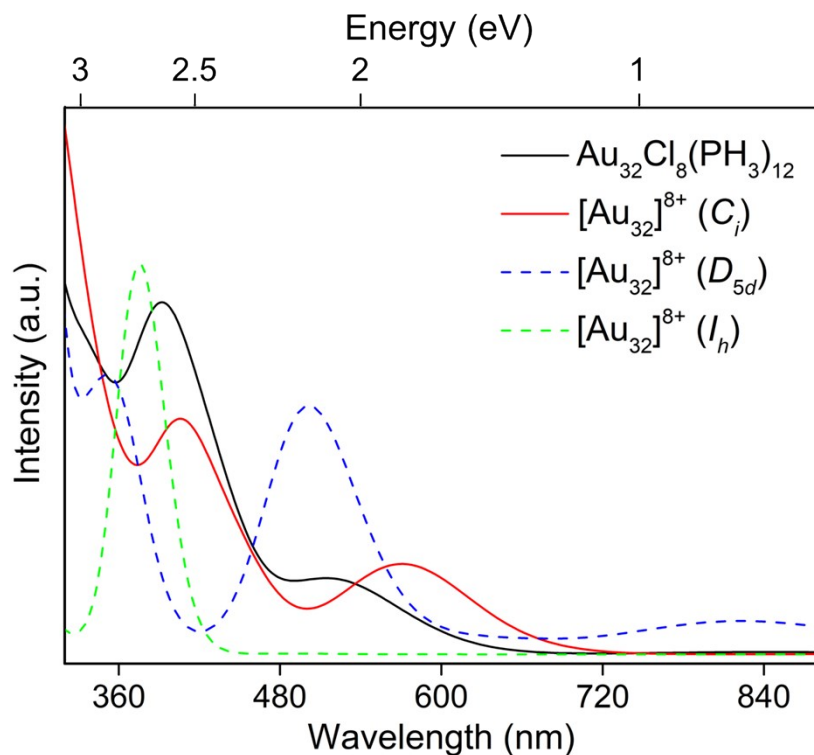

Figure S3. Simulated UV-Vis spectra of  $\text{Au}_{32}\text{Cl}_8(\text{PH}_3)_{12}$  and of the various computed  $[\text{Au}_{32}]^{8+}$  structures using CAM-B3LYP functional.
